# Supplementary material for: Microbial diversity and metaproteomic analysis of activated sludge responses to naphthalene and anthracene exposure
Source: Royal Society of Chemistry journal article supplement (doi:10.1039/c9ra04674g), 2019-01-01
Supplement: c9ra04674g1.pdf [file c9ra04674g1.pdf]

### Supplementary Information

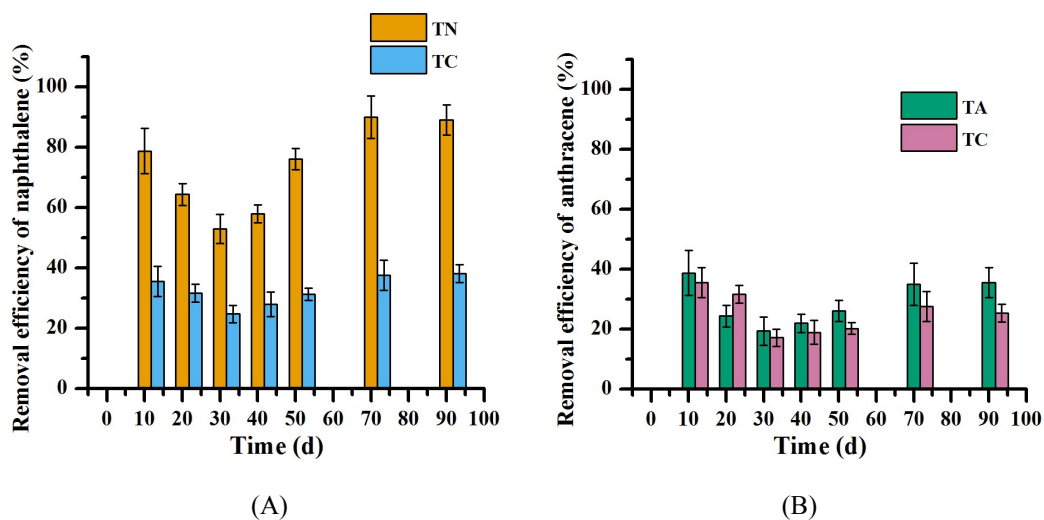

**Fig. S1** The removal efficiency of naphthalene (A) and anthracene (B) in different treated groups. Each data point represents the mean of triplicated data with  $\pm$ S.E.

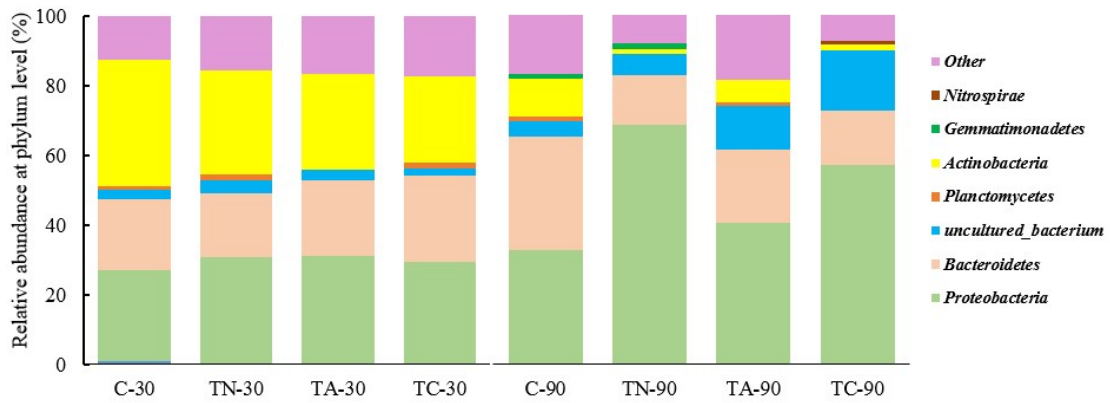

(A)

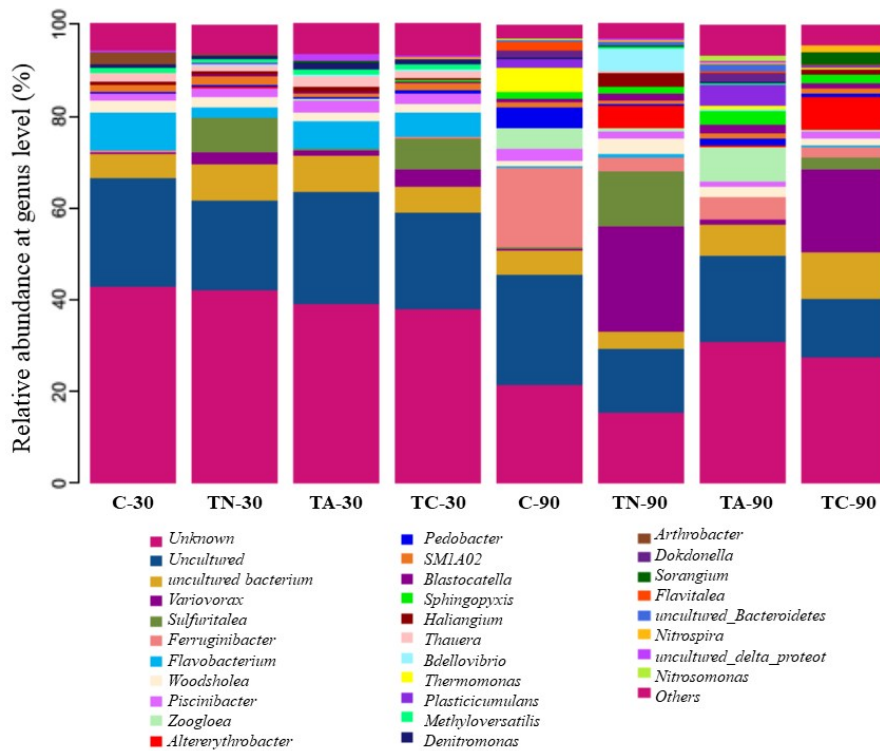

(B)

**Fig. S2** Relative abundance of the dominant bacteria at phylum and genus level in the sludge samples. (A) phylum level; (B) genus level. C: control group without PAHs addition; TN: naphthalene addition in the influent; TA: anthracene addition in the influent; TC: naphthalene and anthracene addition in the influent. 30: sampling at 30 d; 90: sampling at 90 d.
